# Supplementary material
Source: ML conference proceedings conference paper supplement (https://proceedings.neurips.cc/paper_files/paper/2015/hash/2b8a61594b1f4c4db0902a8a395ced93-Abstract.html)
Supplement: Supplementary file [file 2b8a61594b1f4c4db0902a8a395ced93-Supplemental.zip]

## Supplemental Material

### 7 On the sub-optimality of deflation – An example

We provide a simple example demonstrating the sub-optimality of deflation based approaches for computing multiple sparse components with disjoint supports. Consider the real  $4 \times 4$  matrix

$$\mathbf{A} = \begin{bmatrix} 1 & 0 & 0 & \epsilon \\ 0 & \delta & 0 & 0 \\ 0 & 0 & \delta & 0 \\ \epsilon & 0 & 0 & 1 \end{bmatrix},$$

with  $\epsilon, \delta > 0$  such that  $\epsilon + \delta < 1$ . Note that  $\mathbf{A}$  is PSD;  $\mathbf{A} = \mathbf{B}^\top \mathbf{B}$  for

$$\mathbf{B} = \begin{bmatrix} 1 & 0 & 0 & \epsilon \\ 0 & \sqrt{\delta} & 0 & 0 \\ 0 & 0 & \sqrt{\delta} & 0 \\ 0 & 0 & 0 & \sqrt{1-\epsilon^2} \end{bmatrix}.$$

We seek two 2-sparse components with disjoint supports, *i.e.*, the solution to

$$\max_{\mathbf{X} \in \mathcal{X}} \sum_{j=1}^2 \mathbf{x}_j^\top \mathbf{A} \mathbf{x}_j, \quad (8)$$

where

$$\mathcal{X} \triangleq \{ \mathbf{X} \in \mathbb{R}^{4 \times 2} : \|\mathbf{x}_i\|_2 \leq 1, \|\mathbf{x}_i\|_0 \leq 2 \ \forall i \in \{1, 2\}, \text{supp}(\mathbf{x}_1) \cap \text{supp}(\mathbf{x}_2) = \emptyset \}.$$

**Iterative computation with deflation.** Following an iterative, greedy procedure with a deflation step, we compute one component at the time. The first component is

$$\mathbf{x}_1 = \arg \max_{\|\mathbf{x}\|_0=2, \|\mathbf{x}\|_2=1} \mathbf{x}^\top \mathbf{A} \mathbf{x}. \quad (9)$$

Recall that for any unit norm vector  $\mathbf{x}$  with support  $I = \text{supp}(\mathbf{x})$ ,

$$\mathbf{x}^\top \mathbf{A} \mathbf{x} \leq \lambda_{\max}(\mathbf{A}_{I,I}), \quad (10)$$

where  $\mathbf{A}_{I,I}$  denotes the principal submatrix of  $\mathbf{A}$  formed by the rows and columns indexed by  $I$ . Equality can be achieved in (10) for  $\mathbf{x}$  equal to the leading eigenvector of  $\mathbf{A}_{I,I}$ . Hence, it suffices to determine the optimal support for  $\mathbf{x}_1$ . Due to the small size of the example, it is easy to determine that the set  $I_1 = \{1, 4\}$  maximizes the objective in (10) over all sets of two indices, achieving value

$$\mathbf{x}_1^\top \mathbf{A} \mathbf{x}_1 = \lambda_{\max} \left( \begin{bmatrix} 1 & \epsilon \\ \epsilon & 1 \end{bmatrix} \right) = 1 + \epsilon. \quad (11)$$

Since subsequent components must have disjoint supports, it follows that the support of the second 2-sparse component  $\mathbf{x}_2$  is  $I_2 = \{2, 3\}$ , and  $\mathbf{x}_2$  achieves value

$$\mathbf{x}_2^\top \mathbf{A} \mathbf{x}_2 = \lambda_{\max} \left( \begin{bmatrix} \delta & 0 \\ 0 & \delta \end{bmatrix} \right) = \delta. \quad (12)$$

In total, the objective value in (8) achieved by the greedy computation with a deflation step is

$$\sum_{j=1}^2 \mathbf{x}_j^\top \mathbf{A} \mathbf{x}_j = 1 + \epsilon + \delta. \quad (13)$$

**The sub-optimality of deflation.** Consider an alternative pair of 2-sparse components  $\mathbf{x}'_1$  and  $\mathbf{x}'_2$  with support sets  $I'_1 = \{1, 2\}$  and  $I'_2 = \{3, 4\}$ , respectively. Based on the above, such a pair achieves objective value in (8) equal to

$$\lambda_{\max} \left( \begin{bmatrix} 1 & 0 \\ 0 & \delta \end{bmatrix} \right) + \lambda_{\max} \left( \begin{bmatrix} \delta & 0 \\ 0 & 1 \end{bmatrix} \right) = 1 + 1 = 2,$$

which clearly outperforms the objective value in (13) (under the assumption  $\epsilon + \delta < 1$ ), demonstrating the sub-optimality of the  $\mathbf{x}_1, \mathbf{x}_2$  pair computed by the deflation-based approach. In fact, for small  $\epsilon, \delta$  the objective value in the second case is larger than the former by almost a factor of two.

## 8 Construction of Bipartite Graph

The following algorithm formally outlines the steps for generating the bipartite graph  $G = (\{U_j\}_{j=1}^k, V, E)$  given a *weight*  $d \times k$  matrix  $\mathbf{W}$ .

---

### Algorithm 4 Generate Bipartite Graph

---

**input** Real  $d \times k$  matrix  $\mathbf{W}$   
**output** Bipartite  $G = (\{U_j\}_{j=1}^k, V, E)$  {Fig. 1}

```

1: for  $j = 1, \dots, k$  do
2:    $U_j \leftarrow \{u_1^{(j)}, \dots, u_s^{(j)}\}$ 
3: end for
4:  $U \leftarrow \cup_{j=1}^k U_j$   $\{|U| = k \cdot s\}$ 
5:  $V \leftarrow \{1, \dots, d\}$ 
6:  $E \leftarrow U \times V$ 
7: for  $i = 1, \dots, d$  do
8:   for  $j = 1, \dots, k$  do
9:     for each  $u \in U_j$  do
10:       $w(u, v_i) \leftarrow W_{ij}^2$ 
11:    end for
12:  end for
13: end for

```

---

## 9 Proofs

### 9.1 Guarantees of Algorithm 2

**Lemma 2.1.** For any real  $d \times k$  matrix  $\mathbf{W}$ , and Algorithm 2 outputs

$$\tilde{\mathbf{X}} = \arg \max_{\mathbf{X} \in \mathcal{X}_k} \sum_{j=1}^k \langle \mathbf{X}^j, \mathbf{W}^j \rangle^2 \quad (14)$$

in time  $O(d \cdot (s \cdot k)^2)$ .

*Proof.* Consider a matrix  $\mathbf{X} \in \mathcal{X}_k$  and let  $I_j, j = 1 \dots, k$  denote the support sets of its columns. By the constraints in  $\mathcal{X}_k$ , those sets are disjoint, i.e.,  $I_{j_1} \cap I_{j_2} = \emptyset \forall j_1, j_2 \in \{1, \dots, k\}, j_1 \neq j_2$ , and

$$\sum_{j=1}^k \langle \mathbf{X}^j, \mathbf{W}^j \rangle^2 = \sum_{j=1}^k \left( \sum_{i \in I_j} X_{ij} \cdot W_{ij} \right)^2 \leq \sum_{j=1}^k \left( \sum_{i \in I_j} W_{ij}^2 \right). \quad (15)$$

The last inequality is due to Cauchy-Schwarz and the fact that  $\|\mathbf{X}^j\|_2 \leq 1, \forall j \in \{1, \dots, k\}$ . In fact, if the supports sets  $I_j, j = 1, \dots, k$  were known, the upper bound in (15) would be achieved by setting  $\mathbf{X}_{I_j}^j = \mathbf{W}_{I_j}^j / \|\mathbf{W}_{I_j}^j\|_2$ , i.e., setting the nonzero subvector of the  $j$ th column of  $\mathbf{X}$  colinear to the corresponding subvector of the  $j$ th column of  $\mathbf{W}$ . Hence, the key step towards computing the optimal solution  $\tilde{\mathbf{X}}$  is to determine the support sets  $I_j, j = 1, \dots, k$  of its columns.

Consider the set of binary matrices

$$\mathcal{Z} \triangleq \left\{ \mathbf{Z} \in \{0, 1\}^{d \times k} : \|\mathbf{Z}^j\|_0 \leq s \forall j \in [k], \text{supp}(\mathbf{Z}^i) \cap \text{supp}(\mathbf{Z}^j) = \emptyset \forall i, j \in [k], i \neq j \right\}.$$

The set represents all possible supports for the members of  $\mathcal{X}_k$ . Taking into account the previous discussion, the maximization in (14) can be written with respect to  $\mathbf{Z} \in \mathcal{Z}$ :

$$\max_{\mathbf{X} \in \mathcal{X}_k} \sum_{j=1}^k \langle \mathbf{X}^j, \mathbf{W}^j \rangle^2 = \max_{\mathbf{Z} \in \mathcal{Z}} \sum_{j=1}^k \sum_{i=1}^d Z_{ij} W_{ij}^2. \quad (16)$$

Let  $\tilde{\mathbf{Z}} \in \mathcal{Z}$  denote the optimal solution, which corresponds to the (support) indicator of  $\tilde{\mathbf{X}}$ . Next, we show that computing  $\tilde{\mathbf{Z}}$  boils down to solving a maximum weight matching problem on the bipartite graph generated by Algorithm 4. Recall that given  $\mathbf{W} \in \mathbb{R}^{d \times k}$ , Algorithm 4 generates a complete weighted bipartite graph  $G = (U, V, E)$  where

- $V$  is a set of  $d$  vertices  $v_1, \dots, v_d$ , corresponding to the  $d$  variables, i.e., the  $d$  rows of  $\tilde{\mathbf{X}}$ .
- $U$  is a set of  $k \cdot s$  vertices, conceptually partitioned into  $k$  disjoint subsets  $U_1, \dots, U_k$ , each of cardinality  $s$ . The  $j$ th subset,  $U_j$ , is associated with the support  $I_j$ ; the  $s$  vertices  $u_\alpha^{(j)}, \alpha = 1, \dots, s$  in  $U_j$  serve as placeholders for the variables/indices in  $I_j$ .

- Finally, the edge set is  $E = U \times V$ . The edge weights are determined by the  $d \times k$  matrix  $\mathbf{W}$  in (6). In particular, the weight of edge  $(u_\alpha^{(j)}, v_i)$  is equal to  $W_{ij}^2$ . Note that all vertices in  $U_j$  are effectively identical; they all share a common neighborhood and edge weights.

It is straightforward to verify that any  $\mathbf{Z} \in \mathcal{Z}$  corresponds to a perfect matching in  $G$  and vice versa;  $Z_{ij} = 1$  if and only if vertex  $v_i \in V$  is matched with a vertex in  $U_j$  (all vertices in  $U_j$  are equivalent with respect to their neighborhood). Further, for a given  $\mathbf{Z} \in \mathcal{Z}$  the objective value in (16) is equal to the weight of the corresponding matching in  $G$ . More formally, For a given perfect matching  $\mathcal{M} \subset E$ , the corresponding indicator matrix  $\mathbf{Z} \in \mathcal{Z}$  (and equivalently the support of its columns) is determined by setting

$$I_j \leftarrow \{i \in [d] : (u, v_i) \in \mathcal{M}, u \in U_j\}, \quad j = 1, \dots, k. \quad (17)$$

The weight of the matching  $\mathcal{M}$  is

$$\sum_{(u,v) \in \mathcal{M}} w(u,v) = \sum_{j=1}^k \sum_{\substack{(u,v_i) \in \mathcal{M}: \\ u \in U_j}} w(u,v_i) = \sum_{j=1}^k \sum_{i \in I_j} W_{ij}^2 = \sum_{j=1}^k \sum_{i=1}^d Z_{ij} \cdot W_{ij}^2, \quad (18)$$

which is equal to the objective function in (16). Conversely, any given indicator matrix  $\mathbf{Z} \in \mathcal{Z}$  corresponds to a perfect matching  $\mathcal{M} \subset E$ . In particular, letting  $I_j \triangleq \text{supp}(\mathbf{Z}^j)$ , and for an arbitrary ordering  $\sigma_j : [s] \rightarrow I_j$  of the elements of  $I_j$ ,

$$\mathcal{M} \leftarrow \{(u_\alpha^{(j)}, v_{\sigma_j(\alpha)}), \alpha = 1, \dots, s, j = 1, \dots, k\}$$

is a perfect matching in  $G$ . The weight of the matching  $\mathcal{M}$  is equal to the objective value in (16) for that  $\mathbf{Z}$ :

$$\sum_{j=1}^k \sum_{i=1}^d Z_{ij} \cdot W_{ij}^2 = \sum_{j=1}^k \sum_{i \in I_j} W_{ij}^2 = \sum_{j=1}^k \sum_{\alpha=1}^s W_{I_j(\alpha),j}^2 = \sum_{(u,v) \in \mathcal{M}} w(u,v). \quad (19)$$

It follows that to determine  $\tilde{\mathbf{Z}}$  that maximizes (16) with respect to  $\mathbf{Z} \in \mathcal{Z}$ , it suffices to compute a maximum weight perfect matching in  $G$ . Then  $\tilde{\mathbf{Z}}$  is obtained as described in (17). Finally, the values of the non-zero entries of  $\tilde{\mathbf{X}}$  are determined as described in the beginning of the proof (lines 4-7 of Algorithm 2), guaranteeing the optimality of  $\tilde{\mathbf{X}}$  for the maximization in (14).

The weighted bipartite graph  $G$  is generated in  $O(d \cdot (s \cdot k))$ . The running time of Algorithm 2 is dominated by the computation of the maximum weight matching of  $G$ . For the case of unbalanced bipartite graph with  $|U| = s \cdot k < d = |V|$  the Hungarian algorithm can be modified [22] to compute the maximum weight bipartite matching in time  $O(|E||U| + |U|^2 \log |U|) = O(d \cdot (s \cdot k)^2)$ . This completes the proof.  $\square$

## 9.2 Guarantees of Algorithm 1 – Proof of Theorem 1

We first prove a more general version of Theorem 1 for arbitrary constraint sets. Combining that with the guarantees of Algorithm 2, we prove the Theorem 1.

**Lemma 9.2.** *For any real  $d \times d$  rank- $r$  PSD matrix  $\bar{\mathbf{A}}$  and arbitrary set  $\mathcal{X} \subset \mathbb{R}^{d \times k}$ , let  $\bar{\mathbf{X}}_\star \triangleq \arg \max_{\mathbf{X} \in \mathcal{X}} \text{Tr}(\mathbf{X}^\top \bar{\mathbf{A}} \mathbf{X})$ . Assuming that there exists an operator  $P_{\mathcal{X}} : \mathbb{R}^{d \times k} \rightarrow \mathcal{X}$  such that  $P_{\mathcal{X}}(\mathbf{W}) = \arg \max_{\mathbf{X} \in \mathcal{X}} \langle \mathbf{x}_j, \mathbf{w}_j \rangle^2$ , then Algorithm 1 outputs  $\bar{\mathbf{X}} \in \mathcal{X}$  such that*

$$\text{Tr}(\bar{\mathbf{X}}^\top \bar{\mathbf{A}} \bar{\mathbf{X}}) \geq (1 - \epsilon) \cdot \text{Tr}(\bar{\mathbf{X}}_\star^\top \bar{\mathbf{A}} \bar{\mathbf{X}}_\star),$$

*in time  $T_{\text{SVD}}(r) + O((\frac{4}{\epsilon})^{r \cdot k} \cdot (T_{\mathcal{X}} + kd))$ , where  $T_{\mathcal{X}}$  is the time required to compute  $P_{\mathcal{X}}(\cdot)$  and  $T_{\text{SVD}}(r)$  the time required to compute the truncated SVD of  $\bar{\mathbf{A}}$ .*

*Proof.* Let  $\bar{\mathbf{A}} = \bar{\mathbf{U}} \bar{\mathbf{\Lambda}} \bar{\mathbf{U}}^\top$  denote the truncated eigenvalue decomposition of  $\bar{\mathbf{A}}$ ;  $\bar{\mathbf{\Lambda}}$  is a diagonal  $r \times r$  whose  $i$ th diagonal entry  $\Lambda_{ii}$  is equal to the  $i$ th largest eigenvalue of  $\bar{\mathbf{A}}$ , while the columns of  $\bar{\mathbf{U}}$  contain the corresponding eigenvectors. By the Cauchy-Schwartz inequality, for any  $\mathbf{x} \in \mathbb{R}^d$ ,

$$\mathbf{x}^\top \bar{\mathbf{A}} \mathbf{x} = \|\bar{\mathbf{\Lambda}}^{1/2} \bar{\mathbf{U}}^\top \mathbf{x}\|_2^2 \geq \langle \bar{\mathbf{\Lambda}}^{1/2} \bar{\mathbf{U}}^\top \mathbf{x}, \mathbf{c} \rangle^2, \quad \forall \mathbf{c} \in \mathbb{R}^r : \|\mathbf{c}\|_2 = 1. \quad (20)$$

In fact, equality in (20) is achieved for  $\mathbf{c}$  colinear to  $\bar{\mathbf{\Lambda}}^{1/2} \bar{\mathbf{U}}^\top \mathbf{x}$ , and hence,

$$\mathbf{x}^\top \bar{\mathbf{A}} \mathbf{x} = \max_{\mathbf{c} \in \mathbb{S}_2^{r-1}} \langle \bar{\mathbf{\Lambda}}^{1/2} \bar{\mathbf{U}}^\top \mathbf{x}, \mathbf{c} \rangle^2. \quad (21)$$

In turn,

$$\text{Tr}(\mathbf{X}^\top \bar{\mathbf{A}} \mathbf{X}) = \sum_{j=1}^k \mathbf{x}_j^\top \bar{\mathbf{A}} \mathbf{x}_j = \max_{\mathbf{C} : \mathbf{C}^j \in \mathbb{S}_2^{r-1} \forall j} \sum_{j=1}^k \langle \bar{\mathbf{\Lambda}}^{1/2} \bar{\mathbf{U}}^\top \mathbf{x}_j, \mathbf{C}^j \rangle^2. \quad (22)$$

Recall that  $\bar{\mathbf{X}}_*$  is the optimal solution of the trace maximization on  $\bar{\mathbf{A}}$ , *i.e.*,

$$\bar{\mathbf{X}}_* \triangleq \arg \max_{\mathbf{X} \in \mathcal{X}} \text{Tr}(\mathbf{X}^\top \bar{\mathbf{A}} \mathbf{X}).$$

Let  $\bar{\mathbf{C}}_*$  be the maximizing value of  $\mathbf{C}$  in (22) for  $\mathbf{X} = \bar{\mathbf{X}}_*$ , *i.e.*,  $\bar{\mathbf{C}}_*$  is an  $r \times k$  matrix with unit-norm columns such that for all  $j \in \{1, \dots, k\}$ ,

$$\bar{\mathbf{X}}_*^j \top \bar{\mathbf{A}} \bar{\mathbf{X}}_*^j = \langle \bar{\Lambda}^{1/2} \bar{\mathbf{U}}^\top \bar{\mathbf{X}}_*^j, \bar{\mathbf{C}}_*^j \rangle^2. \quad (23)$$

Algorithm 1 iterates over the points ( $r \times k$  matrices)  $\mathbf{C}$  in  $\mathcal{N}_{\epsilon/2}^{\otimes k}(\mathbb{S}_2^{r-1})$ , the  $k$ th cartesian power of a finite  $\epsilon/2$ -net of the  $r$ -dimensional  $l_2$ -unit sphere. At each such point  $\mathbf{C}$ , it computes a candidate

$$\tilde{\mathbf{X}} = \arg \max_{\mathbf{X} \in \mathcal{X}} \sum_{j=1}^k \langle \mathbf{X}^j, \mathbf{U} \bar{\Lambda}^{1/2} \mathbf{C}^j \rangle^2$$

via Algorithm 2 (See Lemma 9.1 for the guarantees of Algorithm 2). By construction, the set  $\mathcal{N}_{\epsilon/2}^{\otimes k}(\mathbb{S}_2^{r-1})$  contains a  $\mathbf{C}_\#$  such that

$$\|\mathbf{C}_\# - \bar{\mathbf{C}}_*\|_{\infty, 2} = \max_{j \in \{1, \dots, k\}} \|\mathbf{C}_\#^j - \bar{\mathbf{C}}_*^j\|_2 \leq \epsilon/2. \quad (24)$$

Based on the above, for all  $j \in \{1, \dots, k\}$ ,

$$\begin{aligned} (\bar{\mathbf{X}}_*^j \top \bar{\mathbf{A}} \bar{\mathbf{X}}_*^j)^{1/2} &= |\langle \bar{\Lambda}^{1/2} \bar{\mathbf{U}}^\top \bar{\mathbf{X}}_*^j, \bar{\mathbf{C}}_*^j \rangle| \\ &= |\langle \bar{\Lambda}^{1/2} \bar{\mathbf{U}}^\top \bar{\mathbf{X}}_*^j, \mathbf{C}_\#^j \rangle + \langle \bar{\Lambda}^{1/2} \bar{\mathbf{U}}^\top \bar{\mathbf{X}}_*^j, (\bar{\mathbf{C}}_*^j - \mathbf{C}_\#^j) \rangle| \\ &\leq |\langle \bar{\Lambda}^{1/2} \bar{\mathbf{U}}^\top \bar{\mathbf{X}}_*^j, \mathbf{C}_\#^j \rangle| + |\langle \bar{\Lambda}^{1/2} \bar{\mathbf{U}}^\top \bar{\mathbf{X}}_*^j, (\bar{\mathbf{C}}_*^j - \mathbf{C}_\#^j) \rangle| \\ &\leq |\langle \bar{\Lambda}^{1/2} \bar{\mathbf{U}}^\top \bar{\mathbf{X}}_*^j, \mathbf{C}_\#^j \rangle| + \|\bar{\Lambda}^{1/2} \bar{\mathbf{U}}^\top \bar{\mathbf{X}}_*^j\| \cdot \|\bar{\mathbf{C}}_*^j - \mathbf{C}_\#^j\| \\ &\leq |\langle \bar{\Lambda}^{1/2} \bar{\mathbf{U}}^\top \bar{\mathbf{X}}_*^j, \mathbf{C}_\#^j \rangle| + (\epsilon/2) \cdot (\bar{\mathbf{X}}_*^j \top \bar{\mathbf{A}} \bar{\mathbf{X}}_*^j)^{1/2}. \end{aligned} \quad (25)$$

The first step follows by the definition of  $\bar{\mathbf{C}}_*$ , the second by the linearity of the inner product, the third by the triangle inequality, the fourth by Cauchy-Schwarz inequality and the last by (24). Rearranging the terms in (25),

$$|\langle \bar{\Lambda}^{1/2} \bar{\mathbf{U}}^\top \bar{\mathbf{X}}_*^j, \mathbf{C}_\#^j \rangle| \geq (1 - \epsilon/2) \cdot (\bar{\mathbf{X}}_*^j \top \bar{\mathbf{A}} \bar{\mathbf{X}}_*^j)^{1/2} \geq 0,$$

and in turn,

$$\langle \bar{\Lambda}^{1/2} \bar{\mathbf{U}}^\top \bar{\mathbf{X}}_*^j, \mathbf{C}_\#^j \rangle^2 \geq (1 - \epsilon/2)^2 \cdot \bar{\mathbf{X}}_*^j \top \bar{\mathbf{A}} \bar{\mathbf{X}}_*^j \geq (1 - \epsilon) \cdot \bar{\mathbf{X}}_*^j \top \bar{\mathbf{A}} \bar{\mathbf{X}}_*^j \quad (26)$$

Summing the terms in (26) over all  $j \in \{1, \dots, k\}$ ,

$$\sum_{j=1}^k \langle \bar{\Lambda}^{1/2} \bar{\mathbf{U}}^\top \bar{\mathbf{X}}_*^j, \mathbf{C}_\#^j \rangle^2 \geq (1 - \epsilon) \cdot \text{Tr}(\bar{\mathbf{X}}_* \top \bar{\mathbf{A}} \bar{\mathbf{X}}_*). \quad (27)$$

Let  $\mathbf{X}_\# \in \mathcal{X}$  be the candidate solution produced by the algorithm at  $\mathbf{C}_\#$ , *i.e.*,

$$\mathbf{X}_\# \triangleq \arg \max_{\mathbf{X} \in \mathcal{X}} \sum_{j=1}^k \langle \mathbf{x}_j, \bar{\mathbf{U}} \bar{\Lambda}^{1/2} \mathbf{C}_\#^j \rangle^2. \quad (28)$$

Then,

$$\begin{aligned} \text{Tr}(\mathbf{X}_\# \top \bar{\mathbf{A}} \mathbf{X}_\#) &\stackrel{(\alpha)}{=} \max_{\mathbf{C}: \mathbf{C}^j \in \mathbb{S}_2^{r-1} \forall j} \sum_{j=1}^k \langle \bar{\Lambda}^{1/2} \bar{\mathbf{U}}^\top \bar{\mathbf{X}}_*^j, \mathbf{C}^j \rangle^2 \\ &\stackrel{(\beta)}{\geq} \sum_{j=1}^k \langle \bar{\Lambda}^{1/2} \bar{\mathbf{U}}^\top \bar{\mathbf{X}}_*^j, \mathbf{C}_\#^j \rangle^2 \\ &\stackrel{(\gamma)}{\geq} \sum_{j=1}^k \langle \bar{\mathbf{X}}_*^j, \bar{\mathbf{U}} \bar{\Lambda}^{1/2} \mathbf{C}_\#^j \rangle^2 \\ &\stackrel{(\delta)}{\geq} (1 - \epsilon) \cdot \text{Tr}(\bar{\mathbf{X}}_* \top \bar{\mathbf{A}} \bar{\mathbf{X}}_*), \end{aligned} \quad (29)$$

where  $(\alpha)$  follows from the observation in (22),  $(\beta)$  from the sub-optimality of  $\mathbf{C}_\#$ ,  $(\gamma)$  by the definition of  $\mathbf{X}_\#$  in (28), while  $(\delta)$  follows from (27). According to (29), at least one of the candidate solutions produced by Algorithm 1, namely  $\mathbf{X}_\#$ , achieves an objective value within a multiplicative factor  $(1 - \epsilon)$  from the optimal, implying the guarantees of the lemma.

Finally, the running time of Algorithm 1 follows immediately from the cost per iteration and the cardinality of the  $\epsilon/2$ -net on the unit-sphere. Note that matrix multiplications can exploit the singular value decomposition which is performed once.  $\square$

**Theorem 1.** For any real  $d \times d$  rank- $r$  PSD matrix  $\bar{\mathbf{A}}$ , desired number of components  $k$ , number  $s$  of nonzero entries per component, and accuracy parameter  $\epsilon \in (0, 1)$ , Algorithm 1 outputs  $\bar{\mathbf{X}} \in \mathcal{X}_k$  such that

$$\text{Tr}(\bar{\mathbf{X}}^\top \bar{\mathbf{A}} \bar{\mathbf{X}}) \geq (1 - \epsilon) \cdot \text{Tr}(\mathbf{X}_*^\top \bar{\mathbf{A}} \mathbf{X}_*),$$

where  $\mathbf{X}_* \triangleq \arg \max_{\mathbf{X} \in \mathcal{X}_k} \text{Tr}(\mathbf{X}^\top \bar{\mathbf{A}} \mathbf{X})$ , in time  $T_{\text{SVD}}(r) + O\left(\left(\frac{4}{\epsilon}\right)^{r \cdot k} \cdot d \cdot (s \cdot k)^2\right)$ .  $T_{\text{SVD}}(r)$  is the time required to compute the truncated SVD of  $\bar{\mathbf{A}}$ .

*Proof.* Recall that  $\mathcal{X}_k$  is the set of  $d \times k$  matrices  $\mathbf{X}$  whose columns have unit length and pairwise disjoint supports. Algorithm 2, given any  $\mathbf{W} \in \mathbb{R}^{d \times k}$ , computes  $\mathbf{X} \in \mathcal{X}_k$  that optimally solves the constrained maximization in line 5. (See Lemma 9.1 for the guarantee of Algorithm 2). in time  $O(d \cdot (s \cdot k)^2)$ . The desired result then follows by Lemma 9.2 for the constrained set  $\mathcal{X}_k$ .  $\square$

### 9.3 Guarantees of Algorithm 3 – Proof of Theorem 2

We prove Theorem 2 with the approximation guarantees of Algorithm 3.

**Lemma 9.3.** For any  $d \times d$  PSD matrices  $\mathbf{A}$  and  $\bar{\mathbf{A}}$ , and any set  $\mathcal{X} \subseteq \mathbb{R}^{d \times k}$  let

$$\mathbf{X}_* \triangleq \arg \max_{\mathbf{X} \in \mathcal{X}} \text{Tr}(\mathbf{X}^\top \mathbf{A} \mathbf{X}), \quad \text{and} \quad \bar{\mathbf{X}}_* \triangleq \arg \max_{\mathbf{X} \in \mathcal{X}} \text{Tr}(\mathbf{X}^\top \bar{\mathbf{A}} \mathbf{X}).$$

Then, for any  $\bar{\mathbf{X}} \in \mathcal{X}$  such that  $\text{Tr}(\bar{\mathbf{X}}^\top \bar{\mathbf{A}} \bar{\mathbf{X}}) \geq \gamma \cdot \text{Tr}(\bar{\mathbf{X}}_*^\top \bar{\mathbf{A}} \bar{\mathbf{X}}_*)$  for some  $0 < \gamma < 1$ ,

$$\text{Tr}(\bar{\mathbf{X}}^\top \mathbf{A} \bar{\mathbf{X}}) \geq \gamma \cdot \text{Tr}(\mathbf{X}_*^\top \mathbf{A} \mathbf{X}_*) - 2 \cdot \|\mathbf{A} - \bar{\mathbf{A}}\|_2 \cdot \max_{\mathbf{X} \in \mathcal{X}} \|\mathbf{X}\|_F^2.$$

*Proof.* By the optimality of  $\bar{\mathbf{X}}_*$  for  $\bar{\mathbf{A}}$ ,

$$\text{Tr}(\bar{\mathbf{X}}_*^\top \bar{\mathbf{A}} \bar{\mathbf{X}}_*) \geq \text{Tr}(\mathbf{X}_*^\top \bar{\mathbf{A}} \mathbf{X}_*).$$

In turn, for any  $\bar{\mathbf{X}} \in \mathcal{X}$  such that  $\text{Tr}(\bar{\mathbf{X}}^\top \bar{\mathbf{A}} \bar{\mathbf{X}}) \geq \gamma \cdot \text{Tr}(\bar{\mathbf{X}}_*^\top \bar{\mathbf{A}} \bar{\mathbf{X}}_*)$  for some  $0 < \gamma < 1$ ,

$$\text{Tr}(\bar{\mathbf{X}}^\top \bar{\mathbf{A}} \bar{\mathbf{X}}) \geq \gamma \cdot \text{Tr}(\mathbf{X}_*^\top \bar{\mathbf{A}} \mathbf{X}_*). \quad (30)$$

Let  $\mathbf{E} \triangleq \mathbf{A} - \bar{\mathbf{A}}$ . By the linearity of the trace,

$$\begin{aligned} \text{Tr}(\bar{\mathbf{X}}^\top \bar{\mathbf{A}} \bar{\mathbf{X}}) &= \text{Tr}(\bar{\mathbf{X}}^\top \mathbf{A} \bar{\mathbf{X}}) - \text{Tr}(\bar{\mathbf{X}}^\top \mathbf{E} \bar{\mathbf{X}}) \\ &\leq \text{Tr}(\bar{\mathbf{X}}^\top \mathbf{A} \bar{\mathbf{X}}) + |\text{Tr}(\bar{\mathbf{X}}^\top \mathbf{E} \bar{\mathbf{X}})|. \end{aligned} \quad (31)$$

By Lemma 10.9,

$$|\text{Tr}(\bar{\mathbf{X}}^\top \mathbf{E} \bar{\mathbf{X}})| \leq \|\bar{\mathbf{X}}\|_F \cdot \|\bar{\mathbf{X}}\|_F \cdot \|\mathbf{E}\|_2 \leq \|\mathbf{E}\|_2 \cdot \max_{\mathbf{X} \in \mathcal{X}} \|\mathbf{X}\|_F^2 \triangleq R. \quad (32)$$

Continuing from (31),

$$\text{Tr}(\bar{\mathbf{X}}^\top \bar{\mathbf{A}} \bar{\mathbf{X}}) \leq \text{Tr}(\bar{\mathbf{X}}^\top \mathbf{A} \bar{\mathbf{X}}) + R. \quad (33)$$

Similarly,

$$\begin{aligned} \text{Tr}(\mathbf{X}_*^\top \bar{\mathbf{A}} \mathbf{X}_*) &= \text{Tr}(\mathbf{X}_*^\top \mathbf{A} \mathbf{X}_*) - \text{Tr}(\mathbf{X}_*^\top \mathbf{E} \mathbf{X}_*) \\ &\geq \text{Tr}(\mathbf{X}_*^\top \mathbf{A} \mathbf{X}_*) - |\text{Tr}(\mathbf{X}_*^\top \mathbf{E} \mathbf{X}_*)| \\ &\geq \text{Tr}(\mathbf{X}_*^\top \mathbf{A} \mathbf{X}_*) - R. \end{aligned} \quad (34)$$

Combining the above, we have

$$\begin{aligned} \text{Tr}(\bar{\mathbf{X}}^\top \mathbf{A} \bar{\mathbf{X}}) &\geq \text{Tr}(\bar{\mathbf{X}}^\top \bar{\mathbf{A}} \bar{\mathbf{X}}) - R \\ &\geq \gamma \cdot \text{Tr}(\mathbf{X}_*^\top \bar{\mathbf{A}} \mathbf{X}_*) - R \\ &\geq \gamma \cdot (\text{Tr}(\mathbf{X}_*^\top \mathbf{A} \mathbf{X}_*) - R) - R \\ &= \gamma \cdot \text{Tr}(\mathbf{X}_*^\top \mathbf{A} \mathbf{X}_*) - (1 + \gamma) \cdot R \\ &\geq \gamma \cdot \text{Tr}(\mathbf{X}_*^\top \mathbf{A} \mathbf{X}_*) - 2 \cdot R, \end{aligned}$$

where the first inequality follows from (33) the second from (30), the third from (34), and the last from the fact that  $R \geq 0$  and  $0 < \gamma \leq 1$ . This concludes the proof.  $\square$

**Remark 9.1.** If in Lemma 9.3 the PSD matrices  $\mathbf{A}$  and  $\bar{\mathbf{A}} \in \mathbb{R}^{d \times d}$  are such that  $\mathbf{A} - \bar{\mathbf{A}}$  is also PSD, then the following tighter bound holds:

$$\text{Tr}(\bar{\mathbf{X}}^\top \mathbf{A} \bar{\mathbf{X}}) \geq \gamma \cdot \text{Tr}(\mathbf{X}_*^\top \mathbf{A} \mathbf{X}_*) - \sum_{i=1}^k \lambda_i(\mathbf{A} - \bar{\mathbf{A}}).$$

*Proof.* This follows from the fact that if  $\mathbf{E} \triangleq \mathbf{A} - \bar{\mathbf{A}}$  is PSD, then

$$\text{Tr}(\bar{\mathbf{X}}^\top \mathbf{E} \bar{\mathbf{X}}) = \sum_{j=1}^d \mathbf{x}_j^\top \mathbf{E} \mathbf{x}_j \geq 0,$$

and the bound in (31) can be improved to

$$\text{Tr}(\bar{\mathbf{X}}^\top \bar{\mathbf{A}} \bar{\mathbf{X}}) = \text{Tr}(\bar{\mathbf{X}}^\top \mathbf{A} \bar{\mathbf{X}}) - \text{Tr}(\bar{\mathbf{X}}^\top \mathbf{E} \bar{\mathbf{X}}) \leq \text{Tr}(\bar{\mathbf{X}}^\top \mathbf{A} \bar{\mathbf{X}}).$$

Further, by Lemma 10.10, the bound in (32) can be improved to

$$\text{Tr}(\bar{\mathbf{X}}^\top \mathbf{E} \bar{\mathbf{X}}) \leq \sum_{i=1}^k \lambda_i(\mathbf{E}) \triangleq R.$$

The rest of the proof follows as is.  $\square$

**Theorem 2.** For any  $n \times d$  input data matrix  $\mathbf{S}$ , with corresponding empirical covariance matrix  $\mathbf{A} = 1/n \cdot \mathbf{S}^\top \mathbf{S}$ , any desired number of components  $k$ , and accuracy parameters  $\epsilon \in (0, 1)$  and  $r$ , Algorithm 3 outputs  $\mathbf{X}_{(r)} \in \mathcal{X}_k$  such that

$$\text{Tr}(\mathbf{X}_{(r)}^\top \mathbf{A} \mathbf{X}_{(r)}) \geq (1 - \epsilon) \cdot \text{Tr}(\mathbf{X}_*^\top \mathbf{A} \mathbf{X}_*) - 2 \cdot k \cdot \|\mathbf{A} - \bar{\mathbf{A}}\|_2,$$

where  $\mathbf{X}_* \triangleq \arg \max_{\mathbf{X} \in \mathcal{X}_k} \text{Tr}(\mathbf{X}^\top \mathbf{A} \mathbf{X})$ , in time  $T_{\text{SKETCH}}(r) + T_{\text{SVD}}(r) + O((\frac{4}{\epsilon})^{r \cdot k} \cdot d \cdot (s \cdot k)^2)$ .

*Proof.* The theorem follows from Lemma 9.3 and the approximation guarantees of Algorithm 1.  $\square$

## 10 Auxiliary Technical Lemmata

**Lemma 10.4.** For any real  $d \times n$  matrix  $\mathbf{M}$ , and any  $r, k \leq \min\{d, n\}$ ,

$$\sum_{i=r+1}^{r+k} \sigma_i(\mathbf{M}) \leq \frac{k}{\sqrt{r+k}} \cdot \|\mathbf{M}\|_F,$$

where  $\sigma_i(\mathbf{M})$  is the  $i$ th largest singular value of  $\mathbf{M}$ .

*Proof.* By the Cauchy-Schwartz inequality,

$$\sum_{i=r+1}^{r+k} \sigma_i(\mathbf{M}) = \sum_{i=r+1}^{r+k} |\sigma_i(\mathbf{M})| \leq \left( \sum_{i=r+1}^{r+k} \sigma_i^2(\mathbf{M}) \right)^{1/2} \cdot \|\mathbf{1}_k\|_2 = \sqrt{k} \cdot \left( \sum_{i=r+1}^{r+k} \sigma_i^2(\mathbf{M}) \right)^{1/2}.$$

Note that  $\sigma_{r+1}(\mathbf{M}), \dots, \sigma_{r+k}(\mathbf{M})$  are the  $k$  smallest among the  $r+k$  largest singular values. Hence,

$$\sum_{i=r+1}^{r+k} \sigma_i^2(\mathbf{M}) \leq \frac{k}{r+k} \sum_{i=1}^{r+k} \sigma_i^2(\mathbf{M}) \leq \frac{k}{r+k} \sum_{i=1}^{\min\{d, n\}} \sigma_i^2(\mathbf{M}) = \frac{k}{r+k} \|\mathbf{M}\|_F^2.$$

Combining the two inequalities, the desired result follows.  $\square$

**Corollary 1.** For any real  $d \times n$  matrix  $\mathbf{M}$  and  $k \leq \min\{d, n\}$ ,  $\sigma_k(\mathbf{M}) \leq k^{-1/2} \cdot \|\mathbf{M}\|_F$ .

*Proof.* It follows immediately from Lemma 10.4.  $\square$

**Lemma 10.5.** Let  $a_1, \dots, a_n$  and  $b_1, \dots, b_n$  be  $2n$  real numbers and let  $p$  and  $q$  be two numbers such that  $1/p + 1/q = 1$  and  $p > 1$ . We have

$$\left| \sum_{i=1}^n a_i b_i \right| \leq \left( \sum_{i=1}^n |a_i|^p \right)^{1/p} \cdot \left( \sum_{i=1}^n |b_i|^q \right)^{1/q}.$$

**Lemma 10.6.** For any two real matrices  $\mathbf{A}$  and  $\mathbf{B}$  of appropriate dimensions,

$$\|\mathbf{AB}\|_F \leq \min\{\|\mathbf{A}\|_2 \|\mathbf{B}\|_F, \|\mathbf{A}\|_F \|\mathbf{B}\|_2\}.$$

*Proof.* Let  $\mathbf{b}_i$  denote the  $i$ th column of  $\mathbf{B}$ . Then,

$$\|\mathbf{AB}\|_F^2 = \sum_i \|\mathbf{Ab}_i\|_2^2 \leq \sum_i \|\mathbf{A}\|_2^2 \|\mathbf{b}_i\|_2^2 = \|\mathbf{A}\|_2^2 \sum_i \|\mathbf{b}_i\|_2^2 = \|\mathbf{A}\|_2^2 \|\mathbf{B}\|_F^2.$$

Similarly, using the previous inequality,

$$\|\mathbf{AB}\|_F^2 = \|\mathbf{B}^\top \mathbf{A}^\top\|_F^2 \leq \|\mathbf{B}^\top\|_2^2 \|\mathbf{A}^\top\|_F^2 = \|\mathbf{B}\|_2^2 \|\mathbf{A}\|_F^2.$$

Combining the two upper bounds, the desired result follows.  $\square$

**Lemma 10.7.** For any  $\mathbf{A}, \mathbf{B} \in \mathbb{R}^{n \times k}$ ,

$$|\langle \mathbf{A}, \mathbf{B} \rangle| \triangleq |\text{Tr}(\mathbf{A}^\top \mathbf{B})| \leq \|\mathbf{A}\|_F \|\mathbf{B}\|_F.$$

*Proof.* The inequality follows from Lemma 10.5 for  $p = q = 2$ , treating  $\mathbf{A}$  and  $\mathbf{B}$  as vectors.  $\square$

**Lemma 10.8.** For any real  $m \times n$  matrix  $\mathbf{A}$ , and any  $k \leq \min\{m, n\}$ ,

$$\max_{\substack{\mathbf{Y} \in \mathbb{R}^{n \times k} \\ \mathbf{Y}^\top \mathbf{Y} = \mathbf{I}_k}} \|\mathbf{AY}\|_F = \left( \sum_{i=1}^k \sigma_i^2(\mathbf{A}) \right)^{1/2}.$$

The maximum is attained by  $\mathbf{Y}$  coinciding with the  $k$  leading right singular vectors of  $\mathbf{A}$ .

*Proof.* Let  $\mathbf{U}\Sigma\mathbf{V}^\top$  be the singular value decomposition of  $\mathbf{A}$ ;  $\mathbf{U}$  and  $\mathbf{V}$  are  $m \times m$  and  $n \times n$  unitary matrices respectively, while  $\Sigma$  is a diagonal matrix with  $\Sigma_{jj} = \sigma_j$ , the  $j$ th largest singular value of  $\mathbf{A}$ ,  $j = 1, \dots, d$ , where  $d \triangleq \min\{m, n\}$ . Due to the invariance of the Frobenius norm under unitary multiplication,

$$\|\mathbf{AY}\|_F^2 = \|\mathbf{U}\Sigma\mathbf{V}^\top \mathbf{Y}\|_F^2 = \|\Sigma\mathbf{V}^\top \mathbf{Y}\|_F^2. \quad (35)$$

Continuing from (35),

$$\|\Sigma\mathbf{V}^\top \mathbf{Y}\|_F^2 = \text{Tr}(\mathbf{Y}^\top \mathbf{V} \Sigma^2 \mathbf{V}^\top \mathbf{Y}) = \sum_{i=1}^k \mathbf{y}_i^\top \left( \sum_{j=1}^d \sigma_j^2 \cdot \mathbf{v}_j \mathbf{v}_j^\top \right) \mathbf{y}_i = \sum_{j=1}^d \sigma_j^2 \cdot \sum_{i=1}^k \left( \mathbf{v}_j^\top \mathbf{y}_i \right)^2.$$

Let  $z_j \triangleq \sum_{i=1}^k \left( \mathbf{v}_j^\top \mathbf{y}_i \right)^2$ ,  $j = 1, \dots, d$ . Note that each individual  $z_j$  satisfies

$$0 \leq z_j \triangleq \sum_{i=1}^k \left( \mathbf{v}_j^\top \mathbf{y}_i \right)^2 \leq \|\mathbf{v}_j\|^2 = 1,$$

where the last inequality follows from the fact that the columns of  $\mathbf{Y}$  are orthonormal. Further,

$$\sum_{j=1}^d z_j = \sum_{j=1}^d \sum_{i=1}^k \left( \mathbf{v}_j^\top \mathbf{y}_i \right)^2 = \sum_{i=1}^k \sum_{j=1}^d \left( \mathbf{v}_j^\top \mathbf{y}_i \right)^2 = \sum_{i=1}^k \|\mathbf{y}_i\|^2 = k.$$

Combining the above, we conclude that

$$\|\mathbf{AY}\|_F^2 = \sum_{j=1}^d \sigma_j^2 \cdot z_j \leq \sigma_1^2 + \dots + \sigma_k^2. \quad (36)$$

Finally, it is straightforward to verify that if  $\mathbf{y}_i = \mathbf{v}_i$ ,  $i = 1, \dots, k$ , then (36) holds with equality.  $\square$

**Lemma 10.9.** For any real  $d \times n$  matrix  $\mathbf{A}$ , and pair of  $d \times k$  matrix  $\mathbf{X}$  and  $n \times k$  matrix  $\mathbf{Y}$  such that  $\mathbf{X}^\top \mathbf{X} = \mathbf{I}_k$  and  $\mathbf{Y}^\top \mathbf{Y} = \mathbf{I}_k$  with  $k \leq \min\{d, n\}$ , the following holds:

$$|\text{Tr}(\mathbf{X}^\top \mathbf{AY})| \leq \sqrt{k} \cdot \left( \sum_{i=1}^k \sigma_i^2(\mathbf{A}) \right)^{1/2}.$$

*Proof.* By Lemma 10.7,

$$|\langle \mathbf{X}, \mathbf{AY} \rangle| = |\text{Tr}(\mathbf{X}^\top \mathbf{AY})| \leq \|\mathbf{X}\|_F \cdot \|\mathbf{AY}\|_F = \sqrt{k} \cdot \|\mathbf{AY}\|_F.$$

where the last inequality follows from the fact that  $\|\mathbf{X}\|_F^2 = \text{Tr}(\mathbf{X}^\top \mathbf{X}) = \text{Tr}(\mathbf{I}_k) = k$ . Combining with a bound on  $\|\mathbf{AY}\|_F$  as in Lemma 10.8, completes the proof.  $\square$

**Lemma 10.10.** For any real  $d \times d$  PSD matrix  $\mathbf{A}$ , and  $k \times d$  matrix  $\mathbf{X}$  with  $k \leq d$  orthonormal columns,

$$\text{Tr}(\mathbf{X}^\top \mathbf{AX}) \leq \sum_{i=1}^k \lambda_i(\mathbf{A})$$

where  $\lambda_i(\mathbf{A})$  is the  $i$ th largest eigenvalue of  $\mathbf{A}$ . Equality is achieved for  $\mathbf{X}$  coinciding with the  $k$  leading eigenvectors of  $\mathbf{A}$ .

*Proof.* Let  $\mathbf{A} = \mathbf{V}\mathbf{V}^\top$  be a factorization of the PSD matrix  $\mathbf{A}$ . Then,  $\text{Tr}(\mathbf{X}^\top \mathbf{AX}) = \text{Tr}(\mathbf{X}^\top \mathbf{V}\mathbf{V}^\top \mathbf{X}) = \|\mathbf{V}^\top \mathbf{X}\|_F^2$ . The desired result follows by Lemma 10.8 and the fact that  $\lambda_i(\mathbf{A}) = \sigma_i^2(\mathbf{V})$ ,  $i = 1, \dots, d$ .  $\square$

## 11 Additional Experimental Results

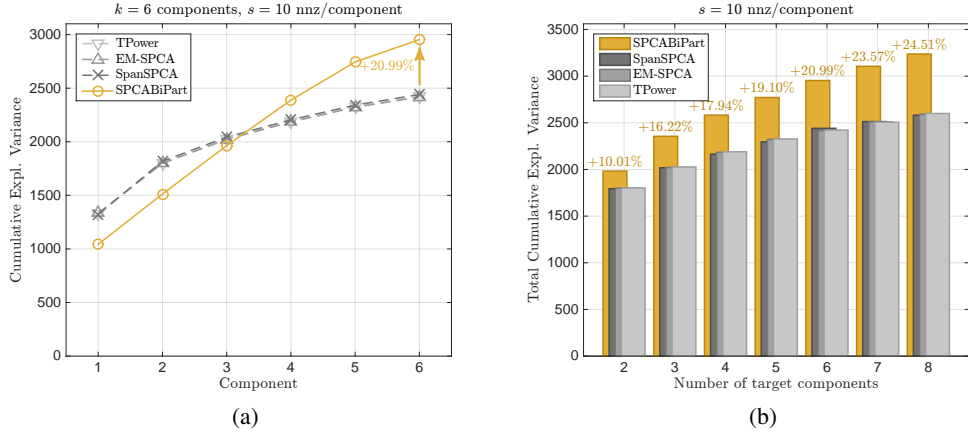

Figure 3: Cumulative variance captured by  $k$   $s$ -spars components computed on the word-by-word matrix – BAGOFWORDS:NIPS dataset [30]. Sparsity is arbitrarily set to  $s = 10$  nonzero entries per component. Fig. 3(a) depicts the cum. variance captured by  $k = 6$  components. Deflation leads to a greedy formation of components; first components capture high variance, but subsequent ones contribute less. On the contrary, our algorithm jointly optimizes the  $k$  components and achieves higher total cum. variance. Fig. 3(b) depicts the total cum. variance achieved for various values of  $k$ . Our algorithm operates on a rank-4 approximation of the input.

|            | Topic 1          | Topic 2   | Topic 3     | Topic 4        | Topic 5        | Topic 6        | Topic 7        | Topic 8        |
|------------|------------------|-----------|-------------|----------------|----------------|----------------|----------------|----------------|
| TPOWER     | 1: network       | algorithm | neuron      | parameter      | object         | classifier     | word           | noise          |
|            | 2: model         | data      | cell        | point          | image          | net            | speech         | control        |
|            | 3: learning      | system    | pattern     | distribution   | recognition    | classification | level          | dynamic        |
|            | 4: input         | error     | layer       | hidden         | images         | class          | context        | step           |
|            | 5: function      | weight    | information | space          | task           | test           | hmm            | term           |
|            | 6: neural        | problem   | signal      | gaussian       | features       | order          | character      | optimal        |
|            | 7: unit          | result    | visual      | linear         | feature        | examples       | processing     | component      |
|            | 8: set           | number    | field       | probability    | representation | rate           | non            | equation       |
|            | 9: training      | method    | synaptic    | mean           | performance    | values         | approach       | single         |
|            | 10: output       | vector    | firing      | case           | view           | experiment     | trained        | analysis       |
| SPANSPCA   | 11: network      | algorithm | neuron      | parameter      | recognition    | control        | classifier     | noise          |
|            | 12: model        | data      | cell        | distribution   | object         | action         | classification | order          |
|            | 13: input        | weight    | pattern     | point          | image          | dynamic        | class          | term           |
|            | 14: learning     | error     | layer       | linear         | word           | step           | net            | component      |
|            | 15: neural       | problem   | signal      | probability    | performance    | optimal        | test           | rate           |
|            | 16: function     | output    | information | space          | task           | policy         | speech         | equation       |
|            | 17: unit         | result    | visual      | gaussian       | features       | states         | examples       | single         |
|            | 18: set          | number    | synaptic    | hidden         | representation | reinforcement  | approach       | analysis       |
|            | 19: system       | method    | field       | case           | feature        | values         | experiment     | large          |
|            | 20: training     | vector    | response    | mean           | images         | controller     | trained        | form           |
| SPCABIPART | 21: data         | function  | neuron      | unit           | learning       | network        | model          | training       |
|            | 22: distribution | algorithm | cell        | weight         | space          | input          | parameter      | hidden         |
|            | 23: gaussian     | set       | visual      | layer          | action         | neural         | information    | performance    |
|            | 24: probability  | error     | direction   | net            | order          | system         | control        | recognition    |
|            | 25: component    | problem   | firing      | task           | step           | output         | dynamic        | classifier     |
|            | 26: approach     | result    | synaptic    | connection     | linear         | pattern        | mean           | test           |
|            | 27: analysis     | number    | response    | activation     | case           | signal         | noise          | word           |
|            | 28: mixture      | method    | spike       | architecture   | values         | processing     | field          | speech         |
|            | 29: likelihood   | vector    | activity    | generalization | term           | image          | local          | classification |
|            | 30: experiment   | point     | motion      | threshold      | optimal        | object         | equation       | trained        |

  

|            | Total Cum. Variance                   |
|------------|---------------------------------------|
| TPOWER     | $2.5999 \cdot 10^3$                   |
| SPANSPCA   | $2.5981 \cdot 10^3$                   |
| SPCABIPART | <b><math>3.2090 \cdot 10^3</math></b> |

Table 4: BAGOFWORDS:NIPS dataset [30]. We run various SPCA algorithms for  $k = 8$  components (topics) and  $s = 10$  nonzero entries per component. The table lists the words selected by each component (words corresponding to higher magnitude entries appear higher in the topic). Our algorithm was configured to use a rank-4 approximation of the input data.



|            | Topic 1       | Topic 2           | Topic 3         | Topic 4           | Topic 5  | Topic 6             | Topic 7  | Topic 8           |
|------------|---------------|-------------------|-----------------|-------------------|----------|---------------------|----------|-------------------|
| TPOWER     | 1: percent    | zzz_bush          | team            | school            | women    | zzz_enron           | drug     | palestinian       |
|            | 2: company    | zzz_al_gore       | game            | student           | show     | firm                | patient  | zzz_israel        |
|            | 3: million    | president         | season          | program           | book     | zzz_arthur_andersen | doctor   | zzz_israeli       |
|            | 4: companies  | official          | player          | high              | com      | deal                | system   | zzz_yasser_arafat |
|            | 5: market     | zzz_george_bush   | play            | children          | look     | lay                 | problem  | attack            |
|            | 6: stock      | campaign          | games           | right             | american | financial           | law      | leader            |
|            | 7: business   | government        | point           | group             | need     | energy              | care     | peace             |
|            | 8: money      | plan              | run             | home              | part     | executives          | cost     | israelis          |
|            | 9: billion    | administration    | coach           | public            | family   | accounting          | help     | israeli           |
|            | 10: fund      | zzz_white_house   | win             | teacher           | found    | partnership         | health   | zzz_west_bank     |
| SPANSPCA   | 11: percent   | team              | zzz_bush        | palestinian       | school   | cup                 | show     | won               |
|            | 12: company   | game              | zzz_al_gore     | attack            | student  | minutes             | com      | night             |
|            | 13: million   | season            | president       | zzz_united_states | children | add                 | part     | left              |
|            | 14: companies | player            | zzz_george_bush | zzz_u_s           | program  | tablespoon          | look     | big               |
|            | 15: market    | play              | campaign        | military          | home     | teaspoon            | need     | put               |
|            | 16: stock     | games             | official        | leader            | family   | oil                 | book     | win               |
|            | 17: business  | point             | government      | zzz_israel        | women    | pepper              | called   | hit               |
|            | 18: money     | run               | political       | zzz_american      | public   | water               | hour     | job               |
|            | 19: billion   | right             | election        | war               | high     | large               | american | ago               |
|            | 20: plan      | coach             | group           | country           | law      | sugar               | help     | zzz_new_york      |
| SPCABIPART | 21: percent   | zzz_united_states | zzz_bush        | company           | team     | cup                 | school   | zzz_al_gore       |
|            | 22: million   | zzz_u_s           | official        | companies         | game     | minutes             | student  | zzz_george_bush   |
|            | 23: money     | zzz_american      | government      | market            | season   | add                 | children | campaign          |
|            | 24: high      | attack            | president       | stock             | player   | tablespoon          | women    | election          |
|            | 25: program   | military          | group           | business          | play     | oil                 | show     | plan              |
|            | 26: number    | palestinian       | leader          | billion           | point    | teaspoon            | book     | tax               |
|            | 27: need      | war               | country         | analyst           | run      | water               | family   | public            |
|            | 28: part      | administration    | political       | firm              | right    | pepper              | look     | zzz_washington    |
|            | 29: problem   | zzz_white_house   | american        | sales             | home     | large               | hour     | member            |
|            | 30: com       | games             | law             | cost              | won      | food                | small    | nation            |

|            | Total Cum. Variance |
|------------|---------------------|
| TPOWER     | 45.4014             |
| SPANSPCA   | 46.0075             |
| SPCABIPART | <b>47.7212</b>      |

Table 5: BAGOFWORDS:NYTIMES dataset [30]. We run various SPCA algorithms for  $k = 8$  components (topics) and  $s = 10$  nonzero entries per component. The table lists the words selected by each component (words corresponding to higher magnitude entries appear higher in the topic). Our algorithm was configured to use a rank-4 approximation of the input data.

|            | Topic 1        | Topic 2           | Topic 3           | Topic 4         | Topic 5      | Topic 6             | Topic 7           | Topic 8           |
|------------|----------------|-------------------|-------------------|-----------------|--------------|---------------------|-------------------|-------------------|
| TPOWER     | 1: percent     | zzz_bush          | team              | school          | com          | zzz_enron           | law               | palestinian       |
|            | 2: company     | zzz_al_gore       | game              | student         | women        | firm                | drug              | zzz_israel        |
|            | 3: million     | zzz_george_bush   | season            | program         | book         | deal                | court             | zzz_israeli       |
|            | 4: companies   | campaign          | player            | children        | web          | financial           | case              | zzz_yasser_arafat |
|            | 5: market      | right             | play              | show            | american     | zzz_arthur_andersen | federal           | peace             |
|            | 6: stock       | group             | games             | public          | information  | chief               | patient           | israelis          |
|            | 7: money       | political         | point             | need            | look         | executive           | system            | israeli           |
|            | 8: business    | zzz_united_states | run               | part            | site         | analyst             | decision          | military          |
|            | 9: government  | zzz_u_s           | coach             | family          | zzz_new_york | executives          | bill              | zzz_palestinian   |
|            | 10: official   | administration    | home              | help            | question     | lay                 | member            | zzz_west_bank     |
|            | 11: billion    | leader            | win               | job             | number       | investor            | lawyer            | war               |
|            | 12: president  | attack            | won               | teacher         | called       | energy              | doctor            | security          |
|            | 13: plan       | zzz_white_house   | night             | country         | find         | investment          | cost              | violence          |
|            | 14: high       | tax               | left              | problem         | found        | employees           | care              | killed            |
|            | 15: fund       | zzz_washington    | guy               | parent          | ago          | accounting          | health            | talk              |
| SPANSPCA   | 16: percent    | team              | official          | zzz_al_gore     | cup          | show                | public            | night             |
|            | 17: company    | game              | zzz_bush          | zzz_george_bush | minutes      | com                 | member            | big               |
|            | 18: million    | season            | zzz_united_states | campaign        | add          | part                | system            | set               |
|            | 19: companies  | player            | attack            | election        | tablespoon   | look                | case              | film              |
|            | 20: market     | play              | zzz_u_s           | political       | teaspoon     | need                | number            | find              |
|            | 21: stock      | games             | palestinian       | vote            | oil          | book                | question          | room              |
|            | 22: business   | point             | military          | republican      | pepper       | women               | job               | place             |
|            | 23: money      | run               | leader            | voter           | water        | family              | told              | friend            |
|            | 24: billion    | right             | zzz_american      | democratic      | large        | called              | put               | took              |
|            | 25: plan       | win               | war               | school          | sugar        | children            | zzz_washington    | start             |
|            | 26: government | coach             | zzz_israel        | presidential    | serving      | help                | found             | car               |
|            | 27: president  | home              | country           | zzz_white_house | butter       | ago                 | information       | feel              |
|            | 28: high       | won               | administration    | law             | chopped      | zzz_new_york        | federal           | half              |
|            | 29: cost       | left              | terrorist         | zzz_republican  | hour         | program             | student           | guy               |
|            | 30: group      | hit               | american          | tax             | pan          | problem             | court             | early             |
| SPCABIPART | 31: company    | show              | cup               | team            | percent      | zzz_al_gore         | official          | school            |
|            | 32: companies  | home              | minutes           | game            | million      | zzz_george_bush     | zzz_bush          | student           |
|            | 33: stock      | run               | add               | season          | money        | campaign            | government        | children          |
|            | 34: market     | com               | tablespoon        | player          | plan         | right               | president         | women             |
|            | 35: billion    | high              | oil               | play            | business     | election            | zzz_united_states | book              |
|            | 36: zzz_enron  | need              | teaspoon          | games           | tax          | political           | zzz_u_s           | family            |
|            | 37: firm       | look              | pepper            | coach           | cost         | point               | group             | called            |
|            | 38: analyst    | part              | water             | guy             | cut          | leader              | attack            | hour              |
|            | 39: industry   | night             | large             | yard            | job          | zzz_washington      | zzz_american      | friend            |
|            | 40: fund       | zzz_new_york      | sugar             | hit             | pay          | administration      | country           | found             |
|            | 41: investor   | help              | serving           | played          | deal         | question            | military          | find              |
|            | 42: sales      | left              | butter            | playing         | quarter      | member              | american          | set               |
|            | 43: customer   | put               | chopped           | ball            | chief        | won                 | war               | room              |
|            | 44: investment | ago               | fat               | fan             | executive    | win                 | law               | film              |
|            | 45: economy    | big               | food              | shot            | financial    | told                | public            | small             |

  

|            | Total Cum. Variance |
|------------|---------------------|
| TPOWER     | 48.140645           |
| SPANSPCA   | 48.767864           |
| SPCABIPART | <b>51.873063</b>    |

Table 6: BAGOFWORDS:NYTIMES dataset [30]. We run various SPCA algorithms for  $k = 8$  components (topics) and cardinality  $s = 15$  per component. The table lists the words corresponding to each component (words corresponding to higher magnitude entries appear higher in the topic). Our algorithm was configured to use a rank-4 approximation of the input data.

|            | Topic 1               | Topic 2           | Topic 3         | Topic 4           | Topic 5      | Topic 6             | Topic 7      | Topic 8           |
|------------|-----------------------|-------------------|-----------------|-------------------|--------------|---------------------|--------------|-------------------|
| TPOWER     | 1: percent            | zzz_bush          | team            | school            | com          | zzz_enron           | drug         | palestinian       |
|            | 2: company            | zzz_al_gore       | game            | student           | women        | court               | patient      | zzz_israel        |
|            | 3: million            | zzz_george_bush   | season          | program           | book         | case                | doctor       | zzz_israeli       |
|            | 4: companies          | campaign          | player          | children          | web          | firm                | cell         | zzz_yasser_arafat |
|            | 5: market             | zzz_united_states | play            | show              | site         | federal             | care         | peace             |
|            | 6: stock              | zzz_u_s           | games           | public            | information  | lawyer              | disease      | israelis          |
|            | 7: government         | political         | point           | part              | zzz_new_york | deal                | health       | israeli           |
|            | 8: official           | attack            | run             | family            | www          | decision            | medical      | zzz_palestinian   |
|            | 9: money              | zzz_american      | home            | system            | hour         | chief               | test         | zzz_west_bank     |
|            | 10: business          | american          | coach           | help              | find         | power               | hospital     | security          |
|            | 11: president         | administration    | win             | problem           | mail         | industry            | research     | violence          |
|            | 12: billion           | leader            | won             | law               | found        | executive           | cancer       | killed            |
|            | 13: plan              | country           | left            | job               | put          | according           | treatment    | talk              |
|            | 14: group             | election          | night           | called            | set          | financial           | study        | meeting           |
|            | 15: high              | zzz_washington    | hit             | look              | room         | office              | death        | soldier           |
|            | 16: right             | military          | guy             | member            | big          | analyst             | human        | minister          |
|            | 17: fund              | zzz_white_house   | yard            | question          | told         | executives          | heart        | zzz_sharon        |
|            | 18: need              | war               | played          | ago               | friend       | zzz_arthur_andersen | blood        | fire              |
|            | 19: cost              | tax               | start           | teacher           | director     | employees           | trial        | zzz_ariel_sharon  |
|            | 20: number            | nation            | playing         | parent            | place        | investor            | benefit      | zzz_arab          |
| SPANSPCA   | 21: percent           | team              | zzz_al_gore     | attack            | school       | cup                 | com          | drug              |
|            | 22: company           | game              | zzz_bush        | zzz_united_states | student      | minutes             | web          | patient           |
|            | 23: million           | season            | zzz_george_bush | zzz_u_s           | children     | add                 | site         | cell              |
|            | 24: companies         | player            | campaign        | palestinian       | program      | tablespoon          | information  | doctor            |
|            | 25: market            | play              | election        | military          | family       | oil                 | computer     | disease           |
|            | 26: stock             | games             | political       | zzz_american      | women        | teaspoon            | find         | care              |
|            | 27: business          | point             | tax             | zzz_israel        | show         | pepper              | big          | health            |
|            | 28: money             | run               | republican      | war               | help         | water               | zzz_new_york | test              |
|            | 29: billion           | win               | zzz_white_house | country           | told         | large               | www          | research          |
|            | 30: government        | home              | vote            | terrorist         | parent       | sugar               | mail         | human             |
|            | 31: president         | won               | law             | american          | problem      | serving             | set          | medical           |
|            | 32: plan              | coach             | administration  | zzz_taliban       | book         | butter              | put          | study             |
|            | 33: high              | left              | democratic      | zzz_afghanistan   | job          | chopped             | director     | death             |
|            | 34: group             | night             | voter           | security          | found        | hour                | industry     | cancer            |
|            | 35: official          | hit               | leader          | zzz_israeli       | friend       | pan                 | room         | hospital          |
|            | 36: need              | guy               | public          | nation            | ago          | fat                 | small        | treatment         |
|            | 37: right             | yard              | zzz_republican  | member            | question     | bowl                | car          | scientist         |
|            | 38: part              | played            | presidential    | support           | teacher      | gram                | zzz_internet | according         |
|            | 39: cost              | look              | federal         | called            | case         | food                | place        | blood             |
|            | 40: system            | start             | zzz_washington  | forces            | number       | medium              | film         | heart             |
| SPCABIPART | 41: palestinian       | percent           | zzz_al_gore     | cup               | school       | team                | company      | official          |
|            | 42: zzz_israel        | million           | zzz_bush        | minutes           | right        | game                | companies    | government        |
|            | 43: zzz_israeli       | money             | zzz_george_bush | add               | group        | season              | market       | president         |
|            | 44: zzz_yasser_arafat | billion           | campaign        | tablespoon        | show         | player              | stock        | zzz_united_states |
|            | 45: peace             | business          | election        | oil               | home         | play                | zzz_enron    | zzz_u_s           |
|            | 46: war               | fund              | political       | teaspoon          | high         | games               | analyst      | attack            |
|            | 47: terrorist         | tax               | zzz_white_house | pepper            | program      | point               | firm         | zzz_american      |
|            | 48: zzz_taliban       | cost              | administration  | water             | need         | run                 | industry     | country           |
|            | 49: zzz_afghanistan   | cut               | republican      | hour              | part         | coach               | investor     | law               |
|            | 50: forces            | job               | leader          | large             | com          | win                 | sales        | plan              |
|            | 51: bin               | pay               | vote            | sugar             | american     | won                 | customer     | public            |
|            | 52: troop             | economy           | democratic      | serving           | look         | left                | price        | zzz_washington    |
|            | 53: laden             | deal              | presidential    | butter            | help         | night               | investment   | member            |
|            | 54: student           | big               | zzz_clinton     | chopped           | problem      | hit                 | quarter      | system            |
|            | 55: zzz_pakistan      | chief             | support         | pan               | called       | guy                 | executives   | nation            |
|            | 56: product           | executive         | zzz_congress    | fat               | zzz_new_york | yard                | consumer     | case              |
|            | 57: zzz_internet      | financial         | military        | bowl              | number       | played              | technology   | federal           |
|            | 58: profit            | start             | policy          | gram              | question     | ball                | share        | information       |
|            | 59: earning           | record            | court           | food              | ago          | playing             | prices       | power             |
|            | 60: shares            | manager           | security        | league            | told         | lead                | growth       | effort            |

  

|            | Total Cum. Variance |
|------------|---------------------|
| TPOWER     | 50.7686             |
| SPANSPCA   | 52.8117             |
| SPCABIPART | <b>54.8906</b>      |

Table 7: BAGOFWORDS:NYTIMES dataset [30]. We run various SPCA algorithms for  $k = 8$  components (topics) and cardinality  $s = 20$  per component. The table lists the words corresponding to each component (words corresponding to higher magnitude entries appear higher in the topic). Our algorithm was configured to use a rank-4 approximation of the input data.

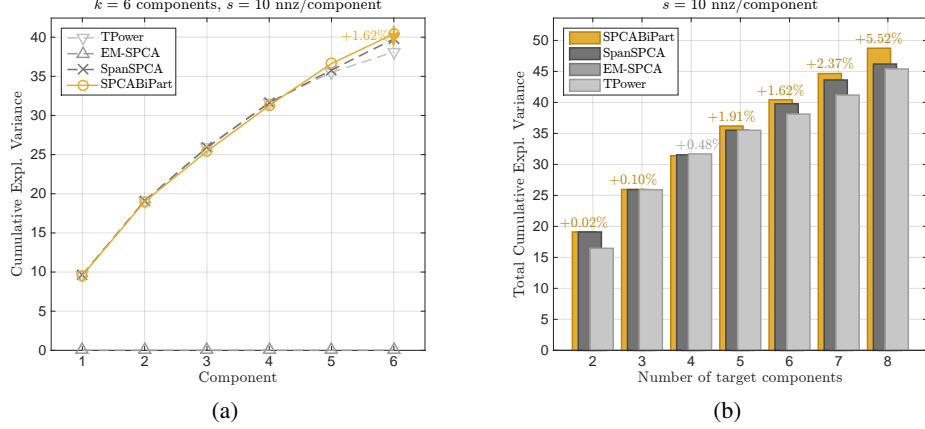

Figure 4: Cumulative variance captured by  $k$   $s$ -sparse ( $s = 10$ ) extracted components on the word-by-word matrix – BAGOFWORDS:NYTIMES dataset [30]. Fig. 4(a) depicts the cum. variance captured by  $k = 6$  components. Deflation leads to a greedy formation of components; first components capture high variance, but subsequent ones contribute less. On the contrary, our algorithm jointly optimizes the  $k$  components and achieves higher total cum. variance. Fig. 4(b) depicts the total cum. variance achieved for various values of  $k$ . Sparsity is arbitrarily set to  $s = 10$  nonzero entries per component. Our algorithm operates on a rank-4 approximation.

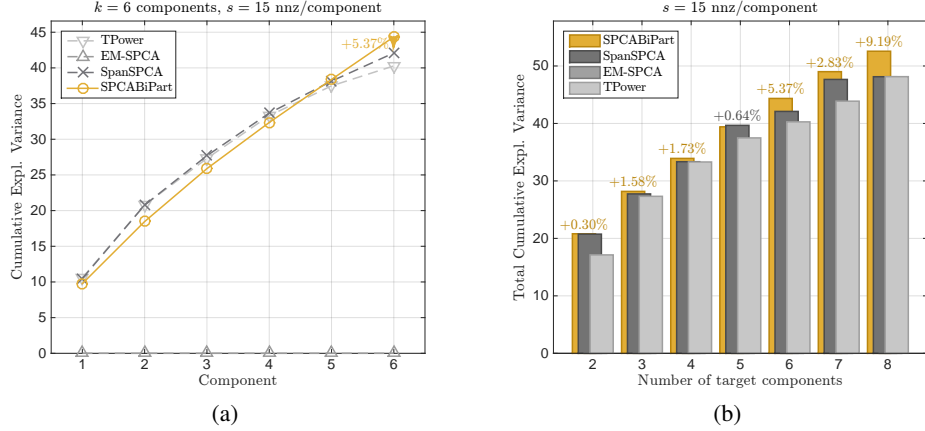

Figure 5: Same as Fig. 4, but for sparsity  $s = 15$ .

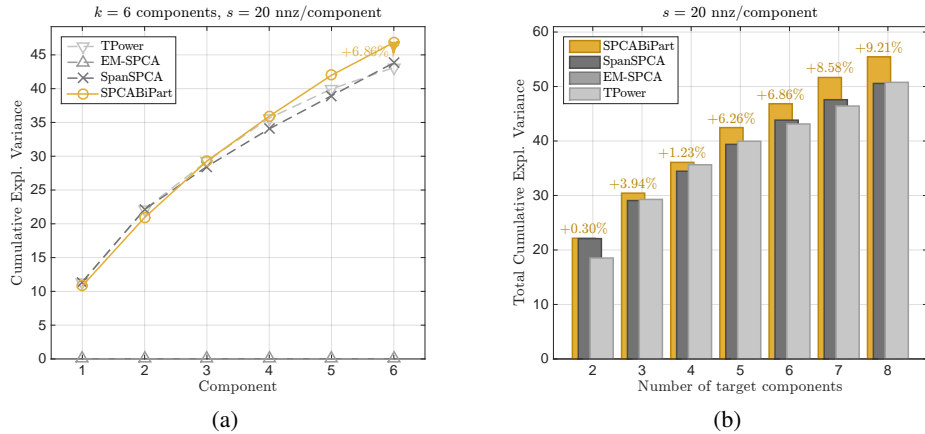

Figure 6: Same as Fig. 4, but for sparsity  $s = 20$ .
